# Supplementary material for: Synthesis and properties of azothiazole based π-conjugated polymers
Source: Royal Society of Chemistry journal article supplement (doi:10.1039/c4tc00809j), 2014-01-01
Supplement: c4tc00809j1.pdf [file c4tc00809j1.pdf]

## **Synthesis and properties of azothiazole based $\pi$ -conjugated polymers**

Zhuangqing Yan, Bin Sun, Chang Guo and Yuning Li\*

Department of Chemical Engineering and Waterloo Institute for nanotechnology (WIN),

University of Waterloo, 200 University Ave West ON, Waterloo, Canada, N2L 3G1

### **Content**

#### **Full citation for Ref. 16**

**Figure S1.** 300 MHz  $^1\text{H}$  NMR spectrum of **PATz-BT** measured in  $\text{CDCl}_3$ .

**Figure S2.** 300 MHz  $^1\text{H}$  NMR spectrum of **PATz-TT** measured in  $\text{CDCl}_3$ .

**Figure S3.** TGA curve of **PATz-BT** measured at a heating rate of  $10\text{ }^\circ\text{C}\cdot\text{min}^{-1}$  under  $\text{N}_2$ .

**Figure S4.** TGA curve of **PATz-TT** measured at a heating rate of  $10\text{ }^\circ\text{C}\cdot\text{min}^{-1}$  under  $\text{N}_2$ .

**Figure S5.** DSC profiles of **PATz-BT** obtained at a scanning rate of  $10\text{ }^\circ\text{C min}^{-1}$  under  $\text{N}_2$ .

**Figure S6.** DSC profiles of **PATz-TT** obtained at a scanning rate of  $10\text{ }^\circ\text{C min}^{-1}$  under  $\text{N}_2$ .

**Figure S7.** GPC elution curve of **PATz-BT** using THF as eluent at a column temperature of  $40\text{ }^\circ\text{C}$ .

**Figure S8.** GPC elution curve of **PATz-TT** using THF as eluent at a column temperature of  $40\text{ }^\circ\text{C}$ .

**Figure S9.** FT-IR spectra of **PATz-BT** and **PATz-TT** on KBr disks.

**Full citation for Ref. 26:** *Gaussian 09, Revision B.01*, M. J. Frisch, G. W. Trucks, H. B. Schlegel, G. E. Scuseria, M. A. Robb, J. R. Cheeseman, G. Scalmani, V. Barone, B. Mennucci, G. A. Petersson, H. Nakatsuji, M. Caricato, X. Li, H. P. Hratchian, A. F. Izmaylov, J. Bloino, G. Zheng, J. L. Sonnenberg, M. Hada, M. Ehara, K. Toyota, R. Fukuda, J. Hasegawa, M. Ishida, T. Nakajima, Y. Honda, O. Kitao, H. Nakai, T. Vreven, J. A. Montgomery, Jr., J. E. Peralta, F. Ogliaro, M. Bearpark, J. J. Heyd, E. Brothers, K. N. Kudin, V. N. Staroverov, R. Kobayashi, J. Normand, K. Raghavachari, A. Rendell, J. C. Burant, S. S. Iyengar, J. Tomasi, M. Cossi, N. Rega, J. M. Millam, M. Klene, J. E. Knox, J. B. Cross, V. Bakken, C. Adamo, J. Jaramillo, R. Gomperts, R. E. Stratmann, O. Yazyev, A. J. Austin, R. Cammi, C. Pomelli, J. W. Ochterski, R. L. Martin, K. Morokuma, V. G. Zakrzewski, G. A. Voth, P. Salvador, J. J. Dannenberg, S. Dapprich, A. D. Daniels, Ö. Farkas, J. B. Foresman, J. V. Ortiz, J. Cioslowski and D. J. Fox, Gaussian, Inc., Wallingford CT, 2009.

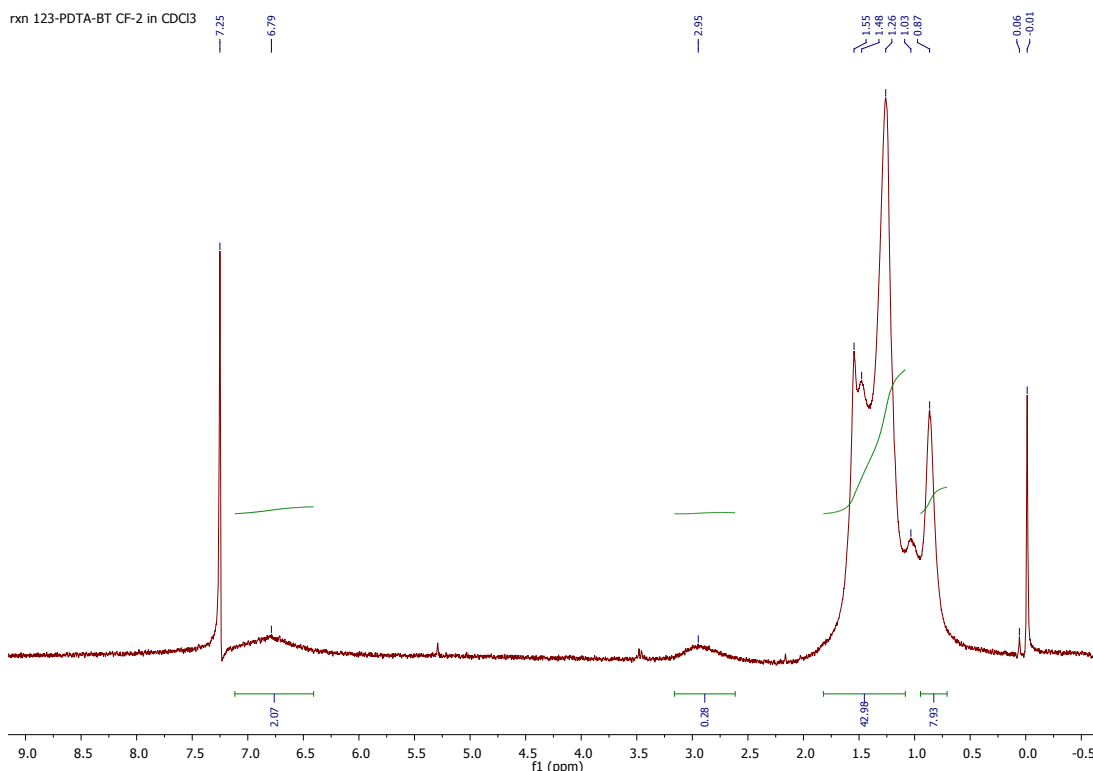

**Figure S1.** 300 MHz  $^1\text{H}$  NMR spectrum of **PATz-BT** measured in  $\text{CDCl}_3$ .

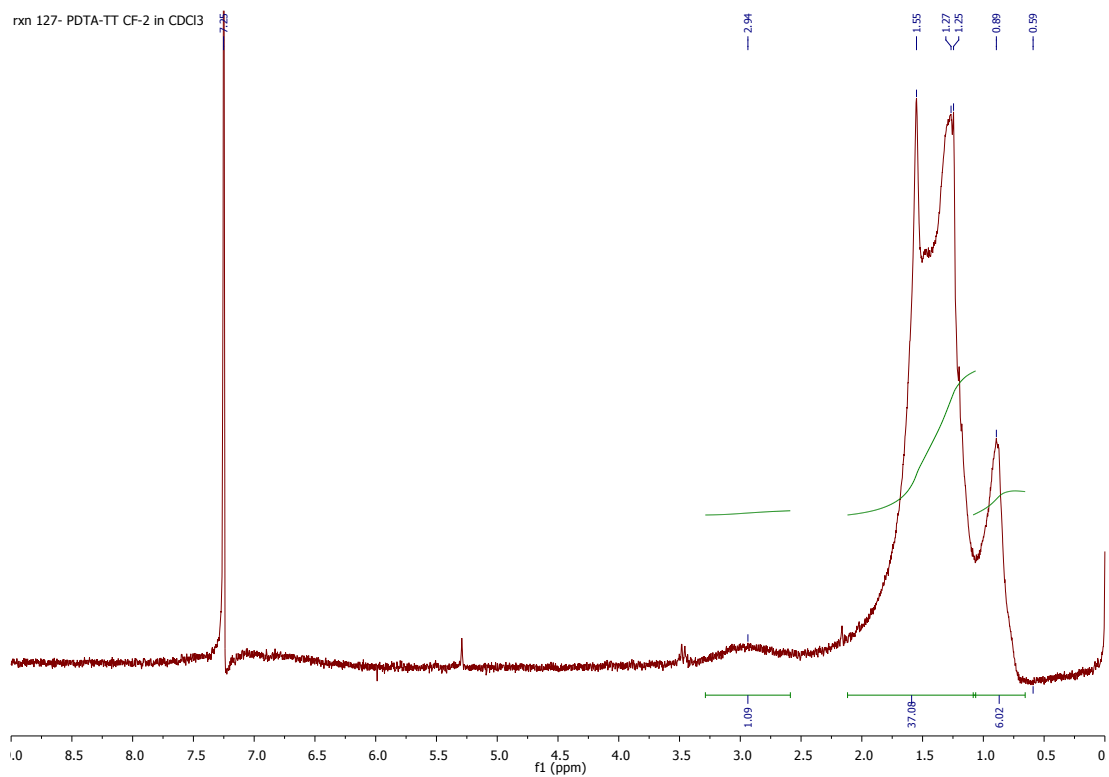

**Figure S2.** 300 MHz  $^1\text{H}$  NMR spectrum of **PATz-TT** measured in  $\text{CDCl}_3$ .

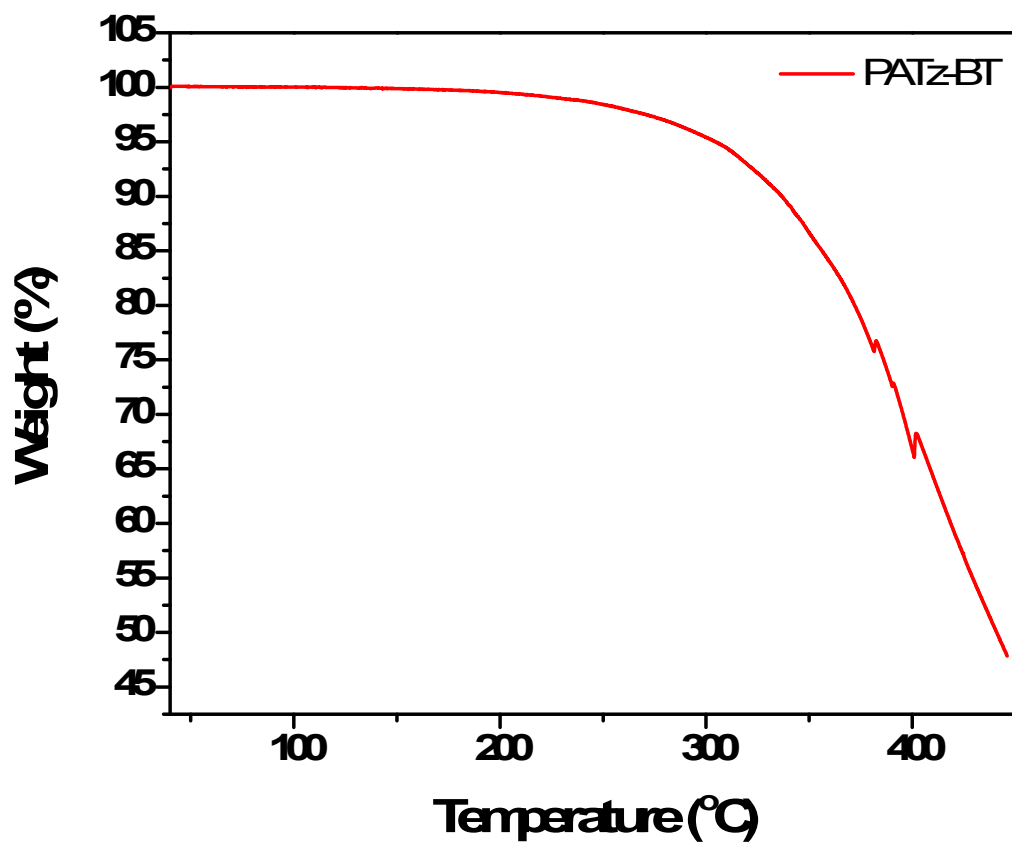

Figure S3. TGA curve of PATz-BT measured at a heating rate of 10 °C min<sup>-1</sup> under N<sub>2</sub>.

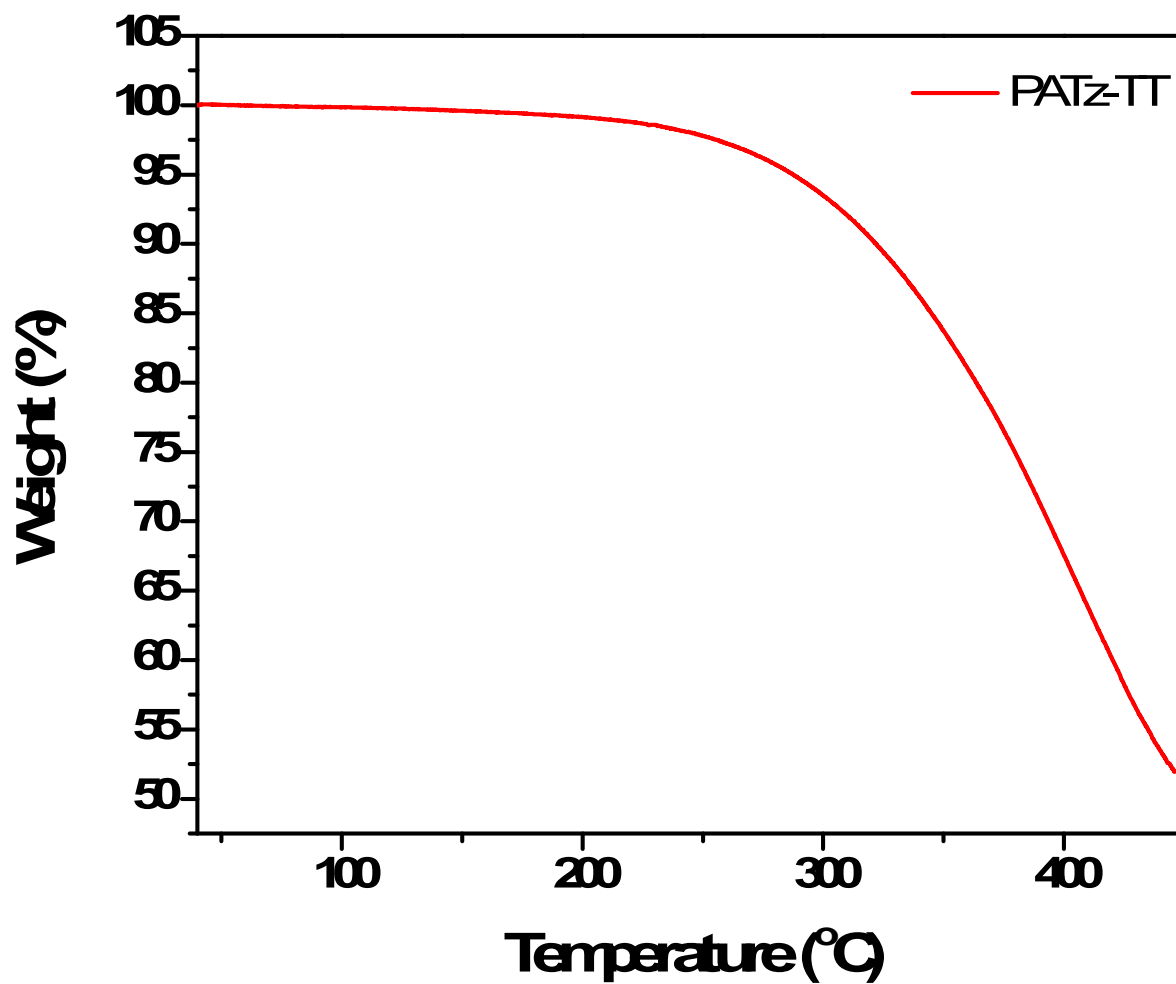

Figure S4. TGA curve of PATz-TT measured at a heating rate of 10 °C min<sup>-1</sup> under N<sub>2</sub>.

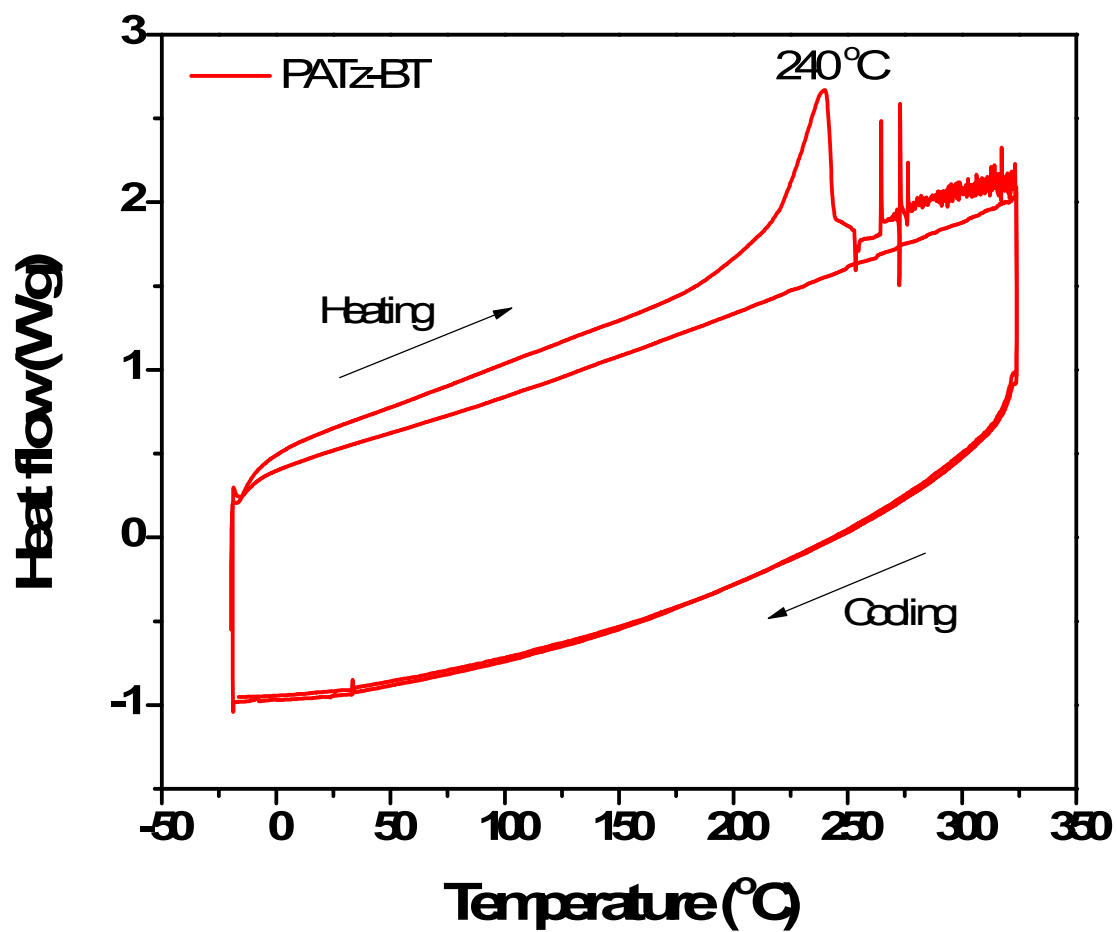

Figure S5. DSC profiles of PATz-BT obtained at a scanning rate of 10 °C min<sup>-1</sup> under N<sub>2</sub>.

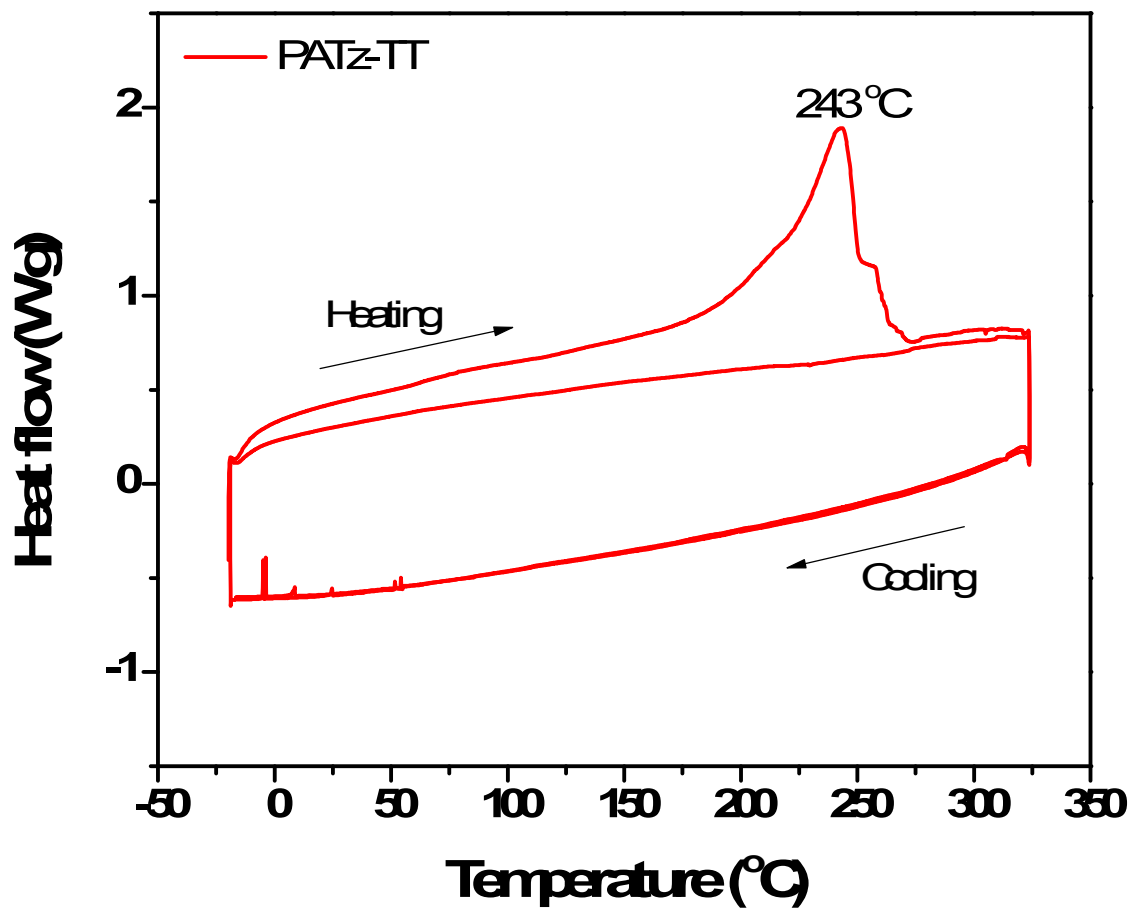

Figure S6. DSC profiles of PATz-TT obtained at a scanning rate of 10 °C min<sup>-1</sup> under N<sub>2</sub>.

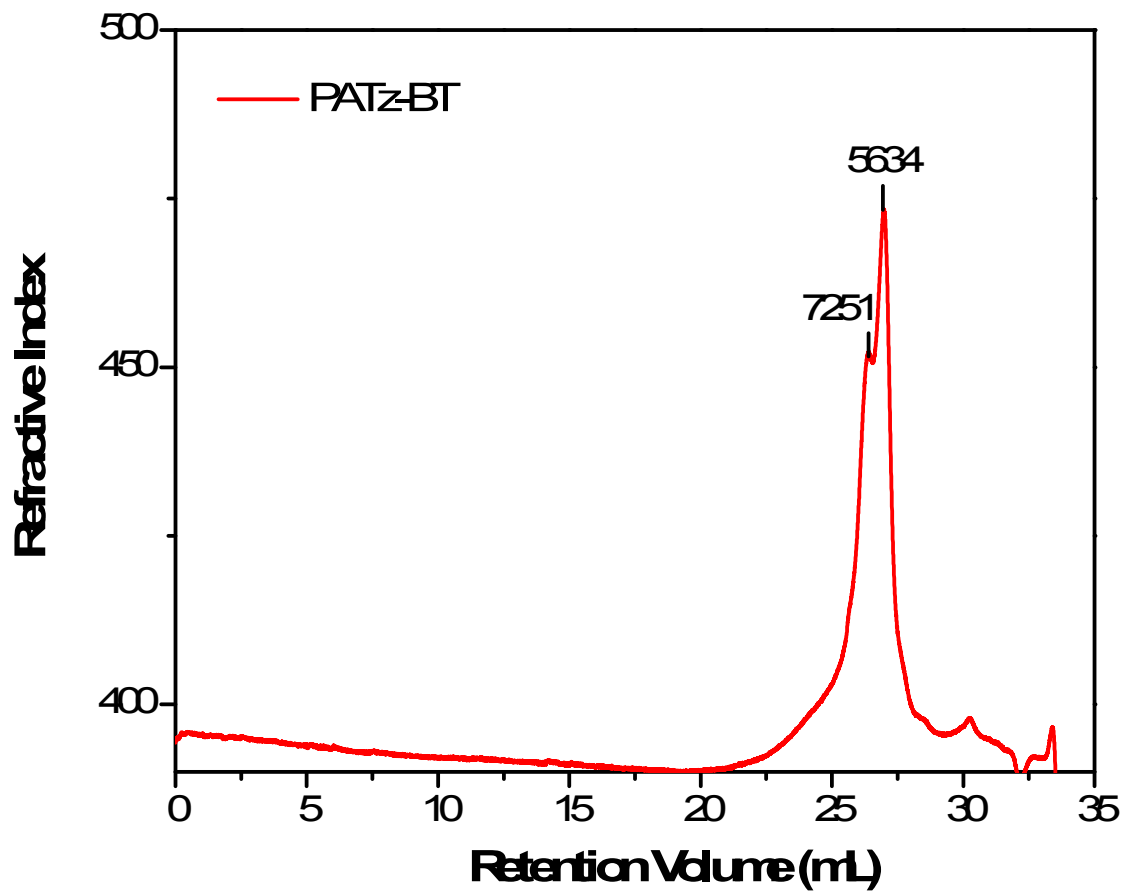

**Figure S7.** GPC elution curve of PATz-BT using THF as eluent at a column temperature of 40 °C.



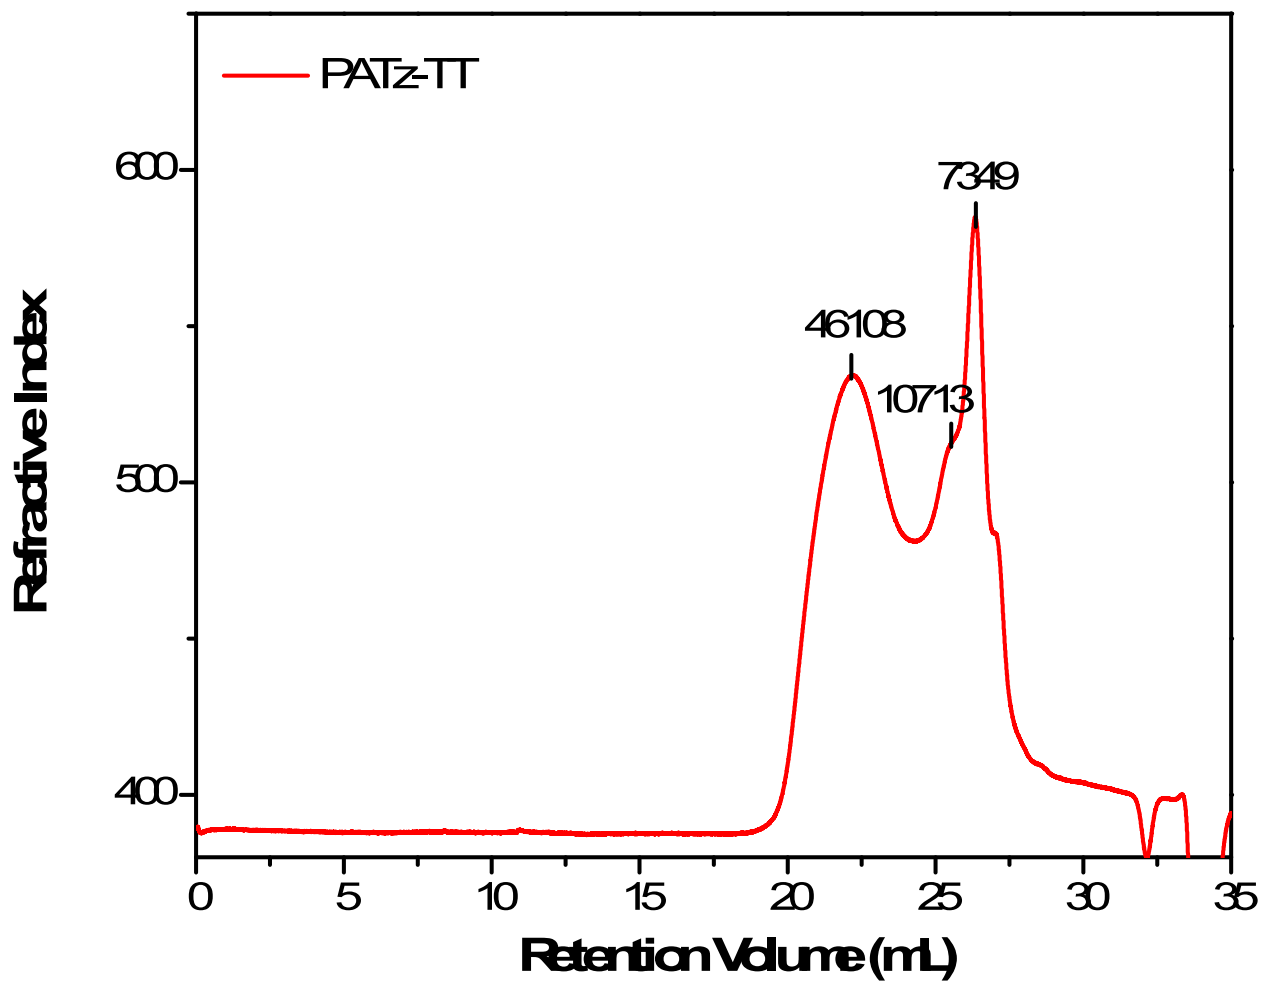

**Figure S8.** GPC elution curve of PATz-TT using THF as eluent at a column temperature of 40 °C.

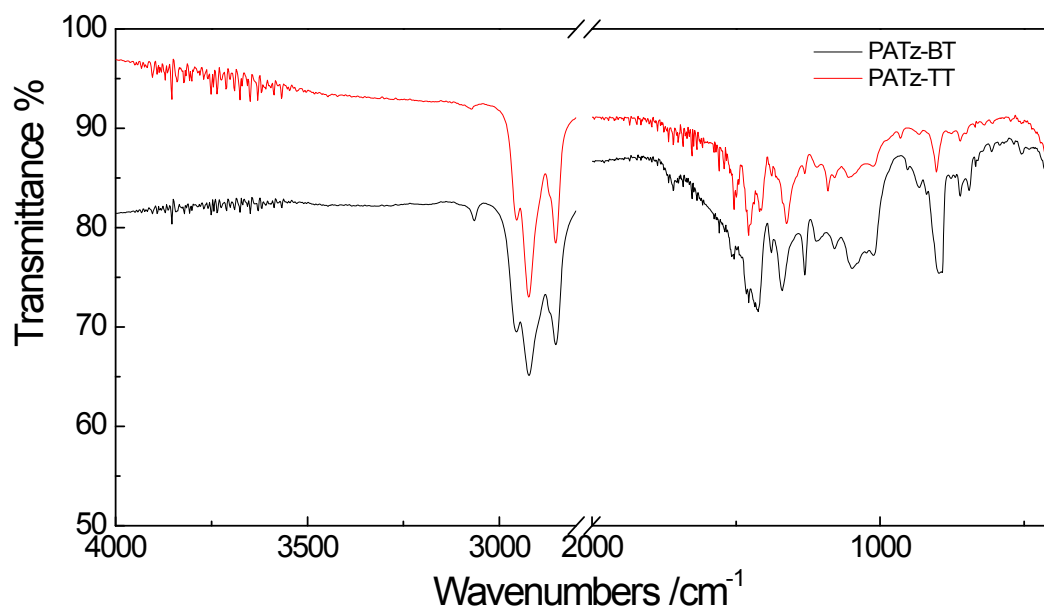

**Figure S9.** FT-IR spectra of **PATz-BT** and **PATz-TT** on KBr disks.
